# Supplementary material
Source: publisher figshare collection journal article supplement (https://karger.figshare.com/ndownloader/files/28997280)
Supplement: Supplementary file 1 [file 28997280]

**SUPPLEMENTAL MATERIAL**

**Workflow times and outcome of endovascular therapy
in stroke patients with initial MRI or CT**

Sebastian Stösser1, MD; Felix J. Bode1, MD; Franziska Dorn2, MD; Gabor C. Petzold1, MD; on behalf of the GSR-ET study group.

1 Division of Vascular Neurology, Department of Neurology, University Hospital Bonn, Venusberg-Campus 1, 53127 Bonn, Germany

2 Department of Neuroradiology, University Hospital Bonn, Venusberg-Campus 1, 53127 Bonn, Germany

*Corresponding Author

Dr. Sebastian Stösser

Department of Neurology

University Hospital Bonn

Venusberg-Campus 1

53127 Bonn, Germany

Tel: 0049-228/287-15750

E-Mail: sebastian.stoesser@ukbonn.de

**Supplemental Figure 1.** Study flowchart. GSR-ET indicates German Stroke Registry–Endovascular Therapy; ETC, endovascular therapy center; MRI, magnetic resonance tomography; CT, computed tomography.


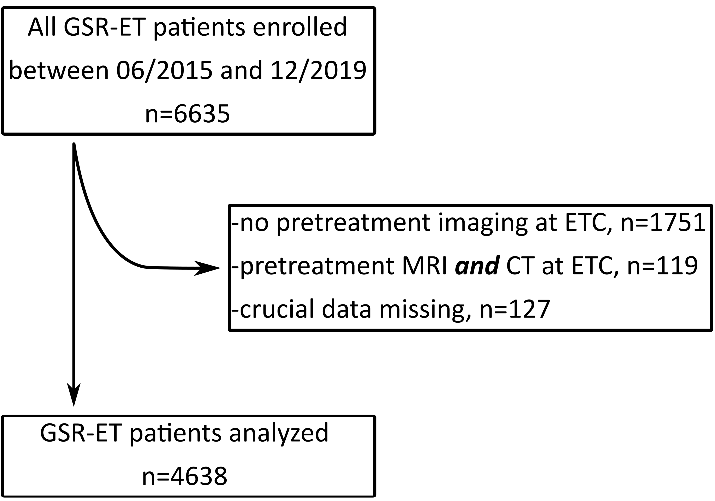


**Supplemental Figure 2.** Median times of consecutive workflow steps from admission to flow restoration of ET patients with initial magnetic resonance imaging (MRI) or computed tomography (CT).


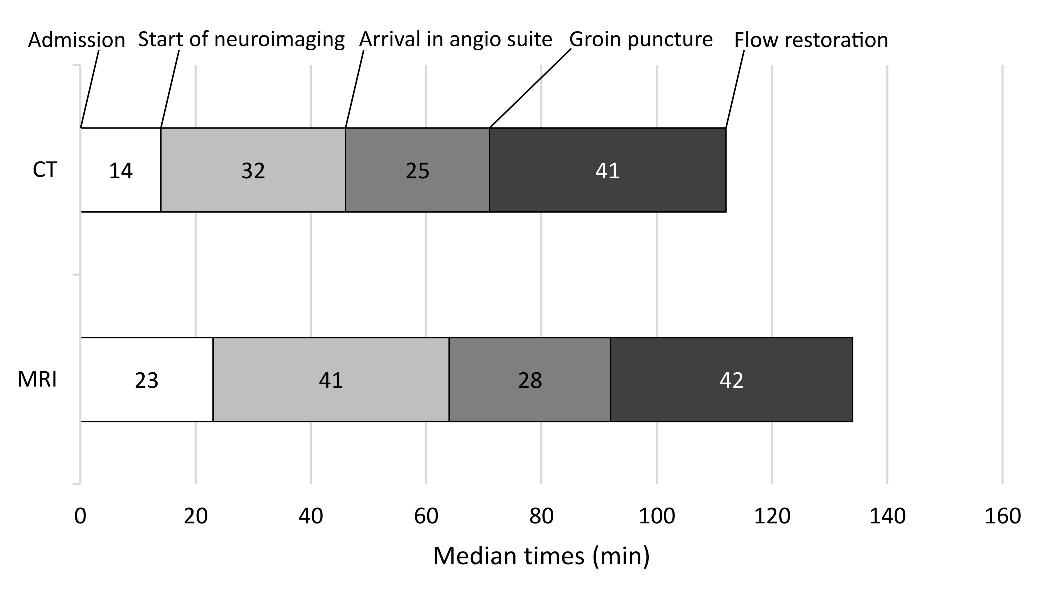


**Supplemental Table 1.** Workflow times from admission to flow restoration of endovascular therapy patients with initial magnetic resonance imaging (MRI) treated in centers with a high versus a low MRI rate.

| Time interval in minutes | High MRI rate  Median (Q1-Q3) N=272 | Low MRI rate  Median (Q1-Q3)  N=98 | p | adjusted p |
| --- | --- | --- | --- | --- |
| **Workflow times from admission** | | | |  |
| Admission to imaging | 23 (16-34) | 22 (15-40) | 0.540 |  |
| Admission to IVT | 39 (30-51) | 46 (31-58) | 0.308 |  |
| Admission to angio suite | 69 (52-92) | 69 (50-115) | 0.467 |  |
| Admission to groin puncture | 100 (76-127) | 93 (65-135) | 0.333 |  |
| Admission to flow restoration | 148 (118-183) | 152 (112-185) | 0.990 |  |
| **Workflow times from imaging** | | | |  |
| Imaging to IVT | 16 (11-28) | 23 (17-38) | **0.005** | **0.025** |
| Imaging to angio suite | 42 (31-56) | 39 (28-59) | 0.366 |  |
| Imaging to groin puncture | 72 (56-95) | 61 (45-88) | **0.011** | **0.027** |
| Imaging to flow restoration | 123 (97-153) | 117 (88-155) | 0.316 |  |
| **Workflow times in angio suite** | | | |  |
| Angio suite to groin puncture | 30 (20-41) | 15 (10-30) | **<0.001** | **<0.001** |
| Groin puncture to flow restoration | 42 (27-69) | 45 (26-73) | 0.972 |  |

Caption: High MRI rate represents the three centers with the highest MRI rates, low MRI rates represents all other centers.p-value adjusted for age, history of dyslipidemia, atrial fibrillation, smoking, previous anticoagulation, admission NIHSS, time (estimated) onset-admission, primary admission in endovascular therapy center, intravenous thrombolysis in endovascular therapy center and general anesthesia. Bold value indicates p<0.05.
